# Supplementary material for: Effects of Wisconsin’s handgun waiting period repeal on suicide rates
Source: PubMed Central journal article supplement — Inj Prev. 2022 Sep 2;28(6):580–4. doi: 10.1136/ip-2022-044719 (PMC9726970; doi:10.1136/ip-2022-044719), 2022-09-02
Supplement: ip-2022-044719supp001.pdf [file ip-2022-044719supp001.pdf]

## SUPPLEMENTAL MATERIAL

Supplemental Table 1. Description of variables and data sources.

| Variable                       | Description                                                                                              | Data Source(s)                                                                                         | Years     | Source Link                                                                                                                                                                                                                                                                                                                                                                                                                           |
|--------------------------------|----------------------------------------------------------------------------------------------------------|--------------------------------------------------------------------------------------------------------|-----------|---------------------------------------------------------------------------------------------------------------------------------------------------------------------------------------------------------------------------------------------------------------------------------------------------------------------------------------------------------------------------------------------------------------------------------------|
| Population                     | Yearly population total                                                                                  | Underlying Cause of Death, 1999-2019 Request, CDC WONDER                                               | 1999-2014 | <a href="https://wonder.cdc.gov/ucd-icd10.html">https://wonder.cdc.gov/ucd-icd10.html</a>                                                                                                                                                                                                                                                                                                                                             |
| Population density             | Yearly population totals obtained from CDC WONDER divided by land area measurements from the 2010 Census | State Area Measurements and Internal Point Coordinates, U.S. Census Bureau                             | 1999-2014 | <a href="https://www.census.gov/geographies/reference-files/2010/geo/state-area.html">https://www.census.gov/geographies/reference-files/2010/geo/state-area.html</a>                                                                                                                                                                                                                                                                 |
| Proportion of population MSA   | Proportion of population residing within a metropolitan statistical area (MSA)                           | Federal Bureau of Investigation Uniform Crime Reporting Program files                                  | 1999-2014 | <a href="https://ucr.fbi.gov/crime-in-the-u.s">https://ucr.fbi.gov/crime-in-the-u.s</a>                                                                                                                                                                                                                                                                                                                                               |
| Proportion of population Black | Proportion of the state population that identify as Black                                                | Underlying Cause of Death, 1999-2019 Request, CDC WONDER                                               | 1999-2014 | <a href="https://wonder.cdc.gov/ucd-icd10.html">https://wonder.cdc.gov/ucd-icd10.html</a>                                                                                                                                                                                                                                                                                                                                             |
| Proportion of population white | Proportion of the state population that identify as white                                                | Underlying Cause of Death, 1999-2019 Request, CDC WONDER                                               | 1999-2014 | <a href="https://wonder.cdc.gov/ucd-icd10.html">https://wonder.cdc.gov/ucd-icd10.html</a>                                                                                                                                                                                                                                                                                                                                             |
| Unemployment rate              | Number of unemployed persons divided by labor force (and multiplied by 100)                              | BLS Data Finder 1.1, Bureau of Labor Statistics                                                        | 1999-2014 | <a href="https://beta.bls.gov/dataQuery/find?q=unadjusted+unemployment&amp;q=Unemployment+Rate:%20(U)&amp;st=0&amp;r=100&amp;st=0">https://beta.bls.gov/dataQuery/find?q=unadjusted+unemployment&amp;q=Unemployment+Rate:%20(U)&amp;st=0&amp;r=100&amp;st=0</a>                                                                                                                                                                       |
| Poverty rate                   | Percentage of the population living below the poverty line                                               | Table 21. Number of Poor and Poverty Rate by State. Current Population Survey, U.S. Census Bureau      | 1999-2014 | <a href="https://www.census.gov/data/tables/time-series/demo/income-poverty/historical-poverty-people.html">https://www.census.gov/data/tables/time-series/demo/income-poverty/historical-poverty-people.html</a>                                                                                                                                                                                                                     |
| Mean income                    | Per capita personal income                                                                               | SAINC1 Personal Income Summary, Bureau of Economic Analysis                                            | 1999-2014 | <a href="https://apps.bea.gov/itable/iTable.cfm?ReqID=70&amp;step=1">https://apps.bea.gov/itable/iTable.cfm?ReqID=70&amp;step=1</a>                                                                                                                                                                                                                                                                                                   |
| Educational attainment         | Percentage of population 25 years or older with high school degree (or equivalent)                       | Educational Attainment Tables, Current Population Survey                                               | 1999-2005 | <a href="https://www.census.gov/topics/education/educational-attainment/data/tables.1999.List_2016040495.html">https://www.census.gov/topics/education/educational-attainment/data/tables.1999.List_2016040495.html</a>                                                                                                                                                                                                               |
|                                |                                                                                                          | S1501 Educational Attainment and Table 233. Educational Attainment by State, American Community Survey | 2006-2014 | <a href="https://www2.census.gov/library/publications/2011/compendia/statab/131e4/tables/12s0233.xls">https://www2.census.gov/library/publications/2011/compendia/statab/131e4/tables/12s0233.xls</a><br>and<br><a href="https://data.census.gov/cedsci/table?q=S1501%3A%20EDUCATIONAL%20ATTAINMENT&amp;tid=ACST5Y2020.S1501">https://data.census.gov/cedsci/table?q=S1501%3A%20EDUCATIONAL%20ATTAINMENT&amp;tid=ACST5Y2020.S1501</a> |
| Ethanol consumption            | Per capita ethanol consumption (in gallons) among statewide population                                   | April 2021 Surveillance Report #117, National Institute on Alcohol Abuse and Alcoholism                | 1999-2014 | <a href="https://apps.bea.gov/itable/iTable.cfm?ReqID=70&amp;step=1">https://apps.bea.gov/itable/iTable.cfm?ReqID=70&amp;step=1</a>                                                                                                                                                                                                                                                                                                   |

**SUPPLEMENTAL MATERIAL**

|                                             |                                            |                                                          |           |                                                                                           |
|---------------------------------------------|--------------------------------------------|----------------------------------------------------------|-----------|-------------------------------------------------------------------------------------------|
| Ratio of firearm-suicide to overall suicide | Firearm suicides divided by total suicides | Underlying Cause of Death, 1999-2019 Request, CDC WONDER | 1999-2014 | <a href="https://wonder.cdc.gov/ucd-icd10.html">https://wonder.cdc.gov/ucd-icd10.html</a> |
|---------------------------------------------|--------------------------------------------|----------------------------------------------------------|-----------|-------------------------------------------------------------------------------------------|

| Outcome                         | Description                                                                                                    | Data Source(s)                                           | Years     | Source Link                                                                               |
|---------------------------------|----------------------------------------------------------------------------------------------------------------|----------------------------------------------------------|-----------|-------------------------------------------------------------------------------------------|
| Handgun suicide rate (demeaned) | Handgun suicide rate (ICD-10 code X72) per 100,000 minus mean handgun suicide rate during 1999-2014 period     | Underlying Cause of Death, 1999-2019 Request, CDC WONDER | 1999-2019 | <a href="https://wonder.cdc.gov/ucd-icd10.html">https://wonder.cdc.gov/ucd-icd10.html</a> |
| Firearm suicide rate (demeaned) | Firearm suicide rate (ICD-10 codes X72-74) per 100,000 minus mean firearm suicide rate during 1999-2014 period |                                                          |           |                                                                                           |

**SUPPLEMENTAL MATERIAL****Supplemental Table 2.** Weights of predictor variables used to construct Synthetic Wisconsin in the handgun and firearm suicide analyses.

| <u>Variable</u>        | <u>Handgun</u> | <u>Firearm</u> |
|------------------------|----------------|----------------|
| Population             | 0.102          | 0.024          |
| Population density     | 0.082          | 0.002          |
| Proportion of pop. MSA | 0.041          | 0.143          |
| Proportion Black       | 0.05           | 0.078          |
| Proportion white       | 0.058          | 0.031          |
| Unemployment rate      | 0.086          | 0.056          |
| Poverty rate           | 0.054          | 0              |
| Mean individual income | 0.119          | 0.261          |
| Educational attainment | 0.059          | 0.113          |
| Ethanol consumption    | 0.145          | 0.055          |
| Ratio of FS:S          | 0.022          | 0.142          |
| 2014 demeaned HSR      | 0.182          | -              |
| 2014 demeaned FSR      |                | 0.094          |

Note: Firearm suicide and overall suicide are abbreviated as FS and S, respectively. Handgun suicide rate is abbreviated as HSR. Firearm suicide rate is abbreviated as FSR.

### SUPPLEMENTAL MATERIAL

**Supplemental Table 3.** Estimated treatment effects and placebo test results for handgun and firearm suicide analyses.

| Outcome         | MSPE  | Donor States | Donor Weights | Treatment Effect per 100,000 | Percentage Change | Post-/Pre-MSPE Placebo test |
|-----------------|-------|--------------|---------------|------------------------------|-------------------|-----------------------------|
| Handgun suicide | 0.040 | Illinois     | 0.210         | 1.14                         | 30.3%             | 1/5<br>p = 0.2              |
|                 |       | Iowa         | 0.243         |                              |                   |                             |
|                 |       | Minnesota    | 0.546         |                              |                   |                             |
| Firearm suicide | 0.073 | Iowa         | 0.280         | 0.45                         | 6.5%              | 3/8<br>p = 0.375            |
|                 |       | Minnesota    | 0.488         |                              |                   |                             |
|                 |       | Rhode Island | 0.232         |                              |                   |                             |

Notes: The percentage change corresponds to the difference between untransformed rates of Wisconsin and its synthetic control in the post-intervention period. The placebo results represent the probability of obtaining a post-/pre-repeal MSPE ratio at least as extreme as that of Wisconsin upon random assignment. All tests were restricted to the subset of donor states with pre-repeal MSPEs less than 5 times that of Wisconsin.

**SUPPLEMENTAL MATERIAL****Supplemental Table 4.** Weights of donor states comprising the original Synthetic Wisconsin for demeaned handgun suicide rates and each “leave-one-out” synthetic control.

| <u>Donor State</u> | <u>Original</u> | <u>Synth 1</u> | <u>Synth 2</u> | <u>Synth 3</u> |
|--------------------|-----------------|----------------|----------------|----------------|
| California         | 0               | 0.222          | 0              | 0.026          |
| Illinois           | 0.210           | -              | 0.218          | 0.276          |
| Iowa               | 0.243           | 0.230          | -              | 0.698          |
| Minnesota          | 0.546           | 0.548          | 0.782          | -              |
| MSPE               | 0.040           | 0.042          | 0.044          | 0.058          |
| Effect             | 1.14            | 1.15           | 1.17           | 1.19           |

## SUPPLEMENTAL MATERIAL

**Supplemental Table 5.** Weights of donor states comprising the original Synthetic Wisconsin for demeaned firearm suicide rates and each “leave-one-out” synthetic control.

| Donor State  | Original | S1    | S2    | S3    | S4    | S5    | S6    | S7    | S8    |
|--------------|----------|-------|-------|-------|-------|-------|-------|-------|-------|
| California   | 0        | -     | 0     | 0     | 0     | 0     | 0     | 0     | 0.129 |
| Hawaii       | 0        | 0     | -     | 0     | 0     | 0     | 0.127 | 0     | 0.001 |
| Illinois     | 0        | 0     | 0     | -     | 0.058 | 0     | 0     | 0     | 0.030 |
| Iowa         | 0.280    | 0.280 | 0.280 | 0.280 | -     | 0.280 | 0.586 | 0.280 | 0.227 |
| Maryland     | 0        | 0     | 0     | 0     | 0     | -     | 0     | 0     | 0     |
| Minnesota    | 0.488    | 0.488 | 0.488 | 0.488 | 0.721 | 0.488 | -     | 0.488 | 0.613 |
| New Jersey   | 0        | 0     | 0     | 0     | 0     | 0     | 0     | -     | 0     |
| Rhode Island | 0.232    | 0.232 | 0.232 | 0.232 | 0.221 | 0.232 | 0.288 | 0.232 | -     |
| MSPE         | 0.073    | 0.073 | 0.073 | 0.073 | 0.089 | 0.073 | 0.106 | 0.073 | 0.101 |
| Effect       | 0.45     | 0.45  | 0.45  | 0.45  | 0.65  | 0.45  | 0.36  | 0.45  | 0.55  |

## SUPPLEMENTAL MATERIAL

**Supplemental Table 6.** Mean pre-intervention (1999-2014) characteristics of Wisconsin, its augmented synthetic control, and the donor pool used to construct counterfactual handgun and firearm suicide trends.

| Variable                               | Wisconsin | Synthetic WI | Sample Mean |
|----------------------------------------|-----------|--------------|-------------|
| <b><u>Handgun Suicide Analysis</u></b> |           |              |             |
| Population                             | 5,575,741 | 5,990,227    | 14,264,826  |
| Population density                     | 102.953   | 89.034       | 144.857     |
| Proportion of pop. MSA                 | 0.716     | 0.754        | 0.780       |
| Proportion Black                       | 0.066     | 0.068        | 0.078       |
| Proportion white                       | 0.900     | 0.880        | 0.851       |
| Unemployment rate                      | 5.624     | 5.198        | 5.951       |
| Poverty rate                           | 10.469    | 9.114        | 11.191      |
| Mean individual income                 | 36,407    | 39,991       | 38,989      |
| Educational attainment                 | 89.088    | 91.122       | 87.303      |
| Ethanol consumption                    | 2.375     | 2.016        | 1.879       |
| Ratio of FS:S                          | 0.479     | 0.468        | 0.444       |
| <b><u>Firearm Suicide Analysis</u></b> |           |              |             |
| Population                             | 5,575,741 | 3,923,836    | 9,216,740   |
| Population density                     | 102.953   | 238.278      | 445.721     |
| Proportion of pop. MSA                 | 0.716     | 0.756        | 0.848       |
| Proportion Black                       | 0.066     | 0.032        | 0.108       |
| Proportion white                       | 0.900     | 0.919        | 0.750       |
| Unemployment rate                      | 5.624     | 5.388        | 5.864       |
| Poverty rate                           | 10.469    | 9.520        | 10.578      |
| Mean individual income                 | 36,407    | 38,551       | 40,724      |
| Educational attainment                 | 89.088    | 89.712       | 87.065      |
| Ethanol consumption                    | 2.375     | 2.039        | 1.899       |
| Ratio of FS:S                          | 0.479     | 0.428        | 0.375       |

Note: Firearm suicide and overall suicide are abbreviated as FS and S, respectively. Handgun suicide is abbreviated as HS.

## SUPPLEMENTAL MATERIAL

**Supplemental Figure 1.** Observed and synthetic handgun suicide (top) and firearm suicide (bottom) trends in an in-time placebo test artificially backdating the waiting period repeal to 2010.

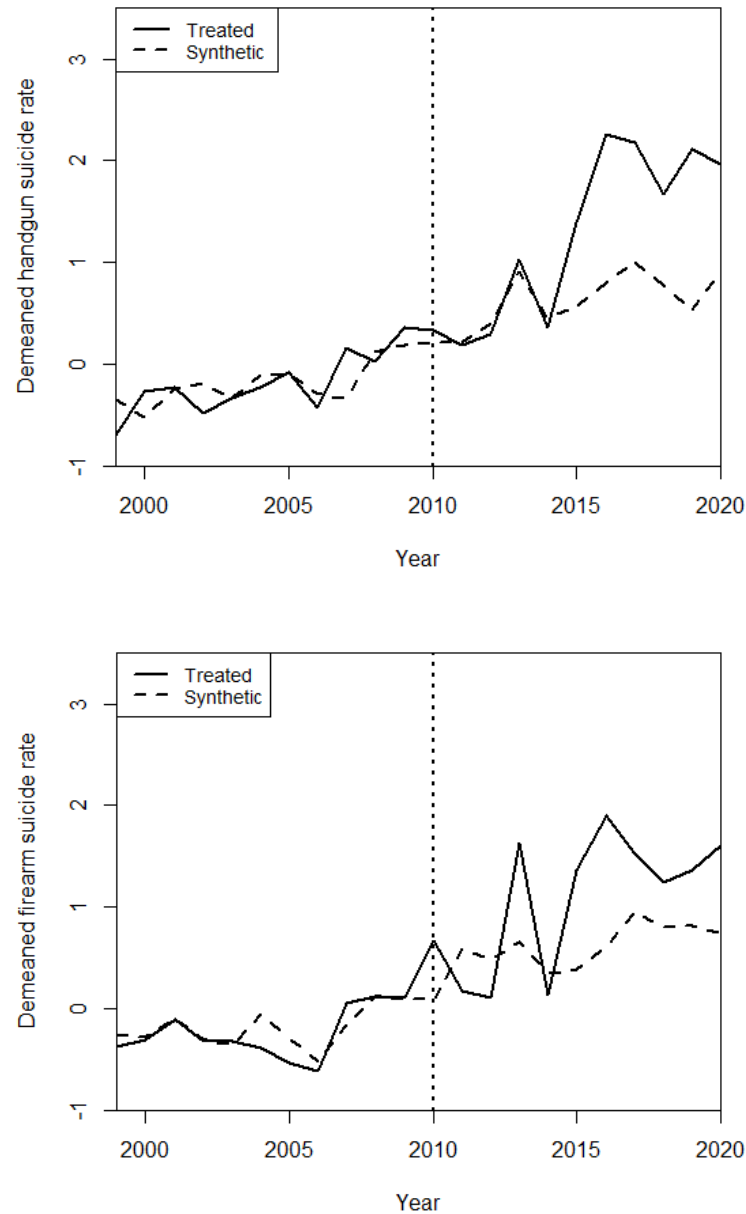



## SUPPLEMENTAL MATERIAL

**Supplemental Figure 2.** Rates of suicides identified as involving handguns (ICD-10 code X72) in Minnesota and Wisconsin (1999-2019). Two-year moving average rates are represented by dashed lines.

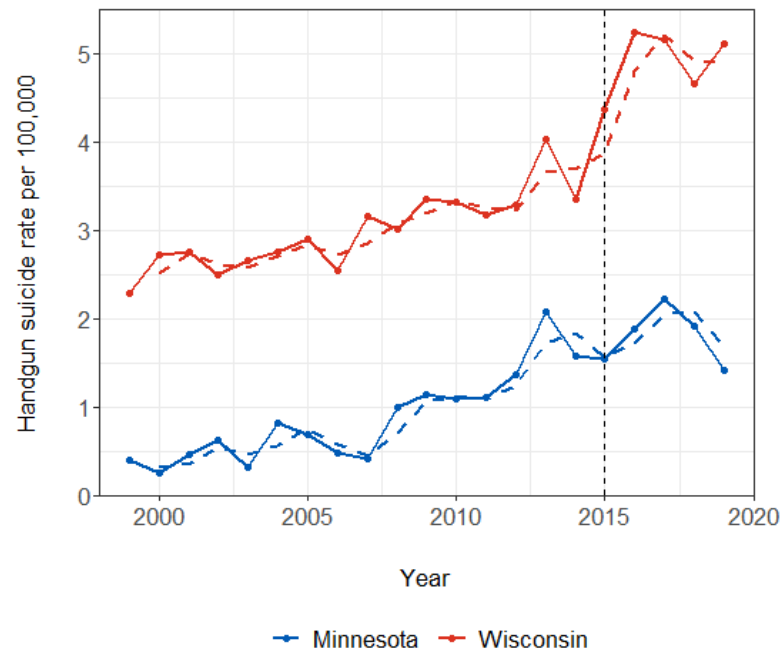

## SUPPLEMENTAL MATERIAL

**Supplemental Figure 3.** Donor weights for augmented synthetic controls of handgun and firearm suicide trends in Wisconsin.

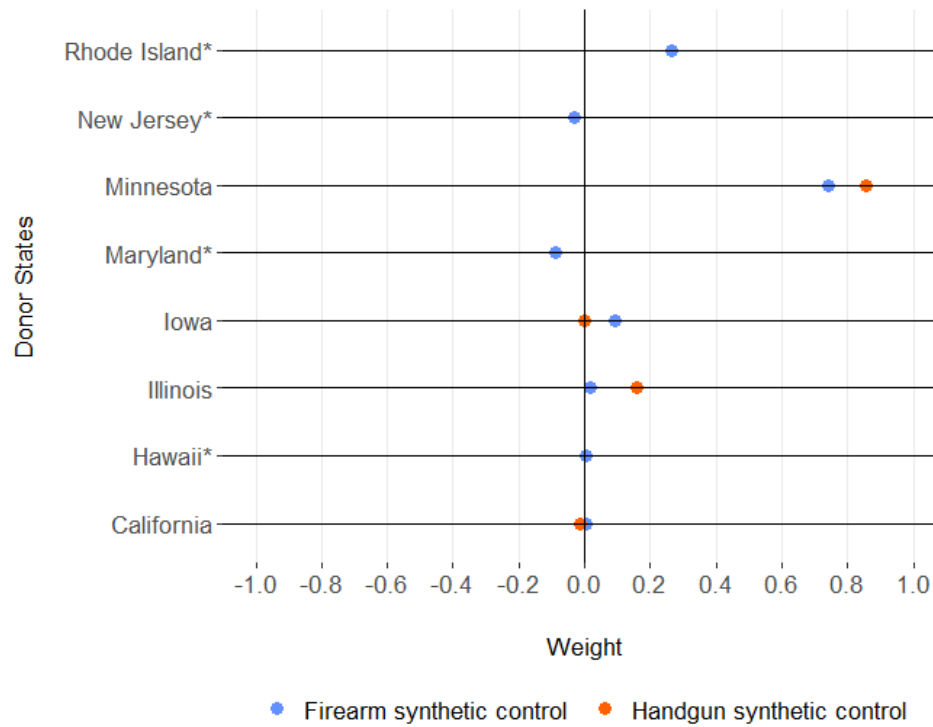

Note: \* denotes donor states that were excluded from the handgun suicide analysis due to suppressed data.
